# Supplementary material for: cis-1,2-Bis(diphenylphosphino)ethylene copper(i) catalyzed C–H activation and carboxylation of terminal alkynes
Source: Royal Society of Chemistry journal article supplement (doi:10.1039/c7nj03038j), 2017-01-01

## Supplementary Information

***cis*-1,2-bis(diphenylphosphino)ethylene copper(I) catalyzed C-H activation and  
carboxylation of terminal alkynes**

**Manoj Trivedi,<sup>a\*</sup> Jacob R. Smreker,<sup>c</sup> Gurmeet Singh,<sup>a\*</sup> Abhinav Kumar<sup>b</sup> and Nigam P.  
Rath<sup>c\*</sup>**

E-mail address: manojtri@gmail.com (MT); rathn@umsl.edu(NPR).

Corresponding author. Tel.: + 91 9811730475 (MT); (314) 516-5333 (NPR).

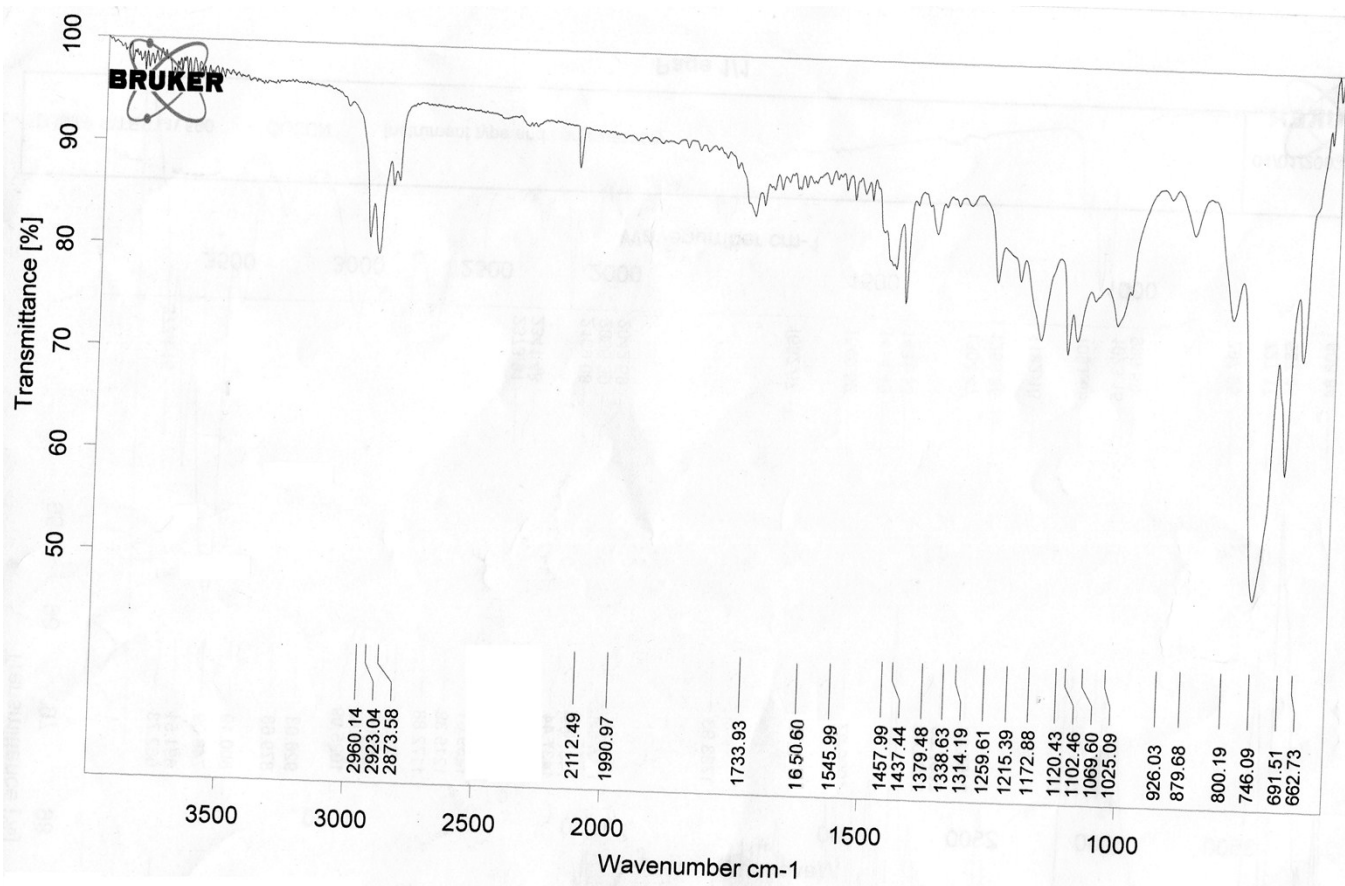

S-1. IR spectrum of complex 1.

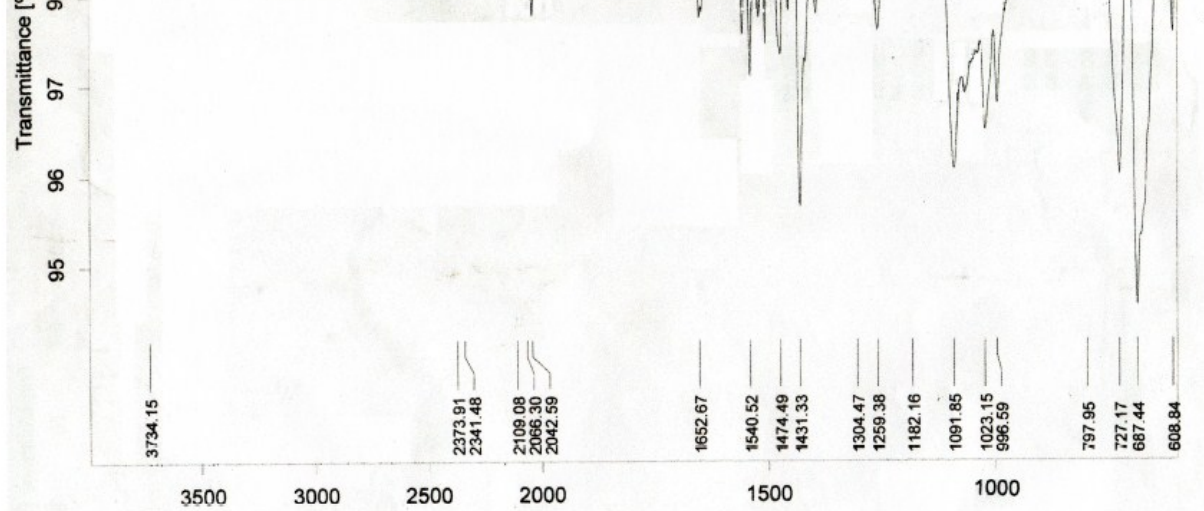

S-2. IR spectrum of complex 2.

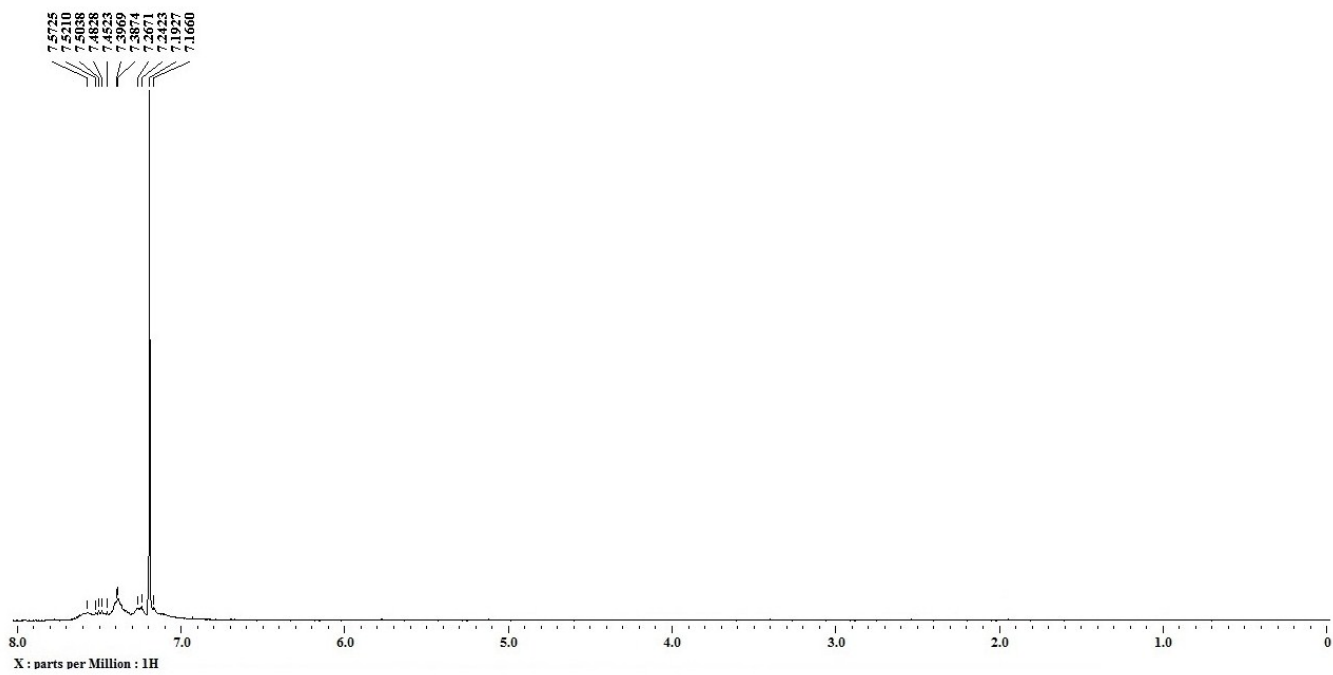

S-3.  $^1\text{H}$  NMR spectrum of complex **1** in  $\text{CDCl}_3$ .

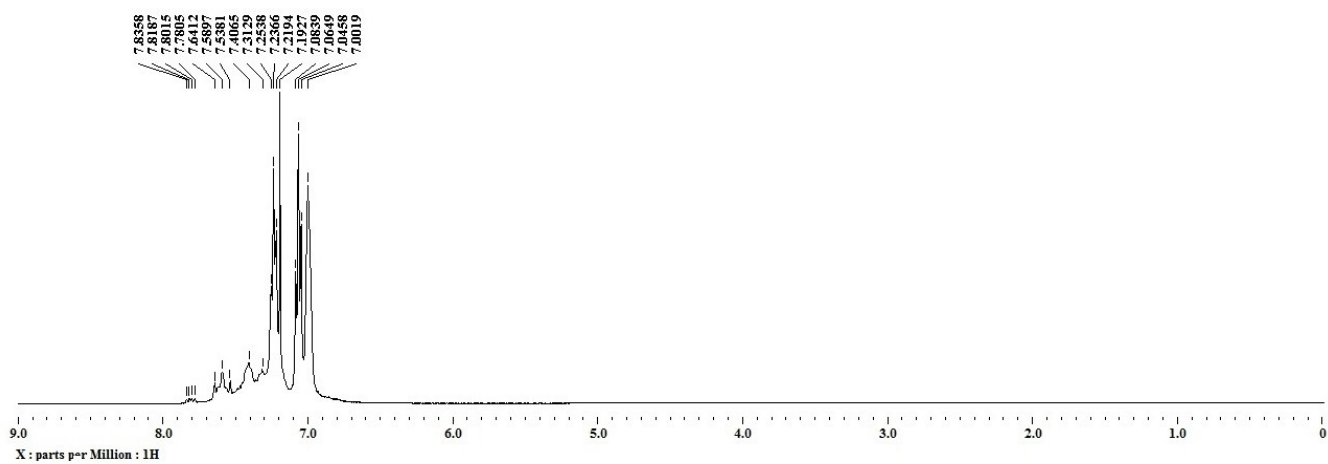

S-4.  $^1\text{H}$  NMR spectrum of complex **2** in  $\text{CDCl}_3$ .

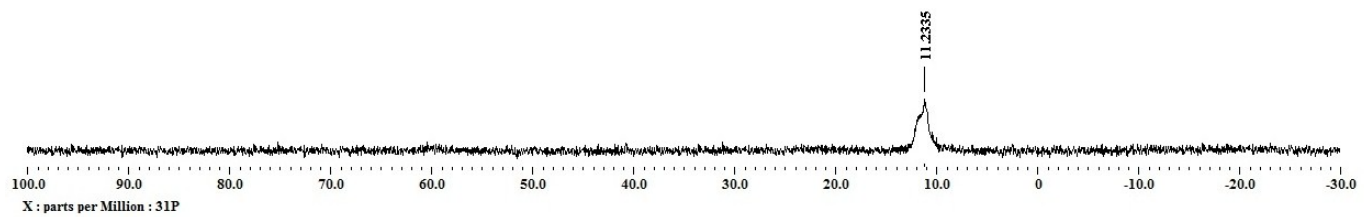

S-5.  $^{31}\text{P}$  NMR spectrum of complex **1** in  $\text{CDCl}_3$ .

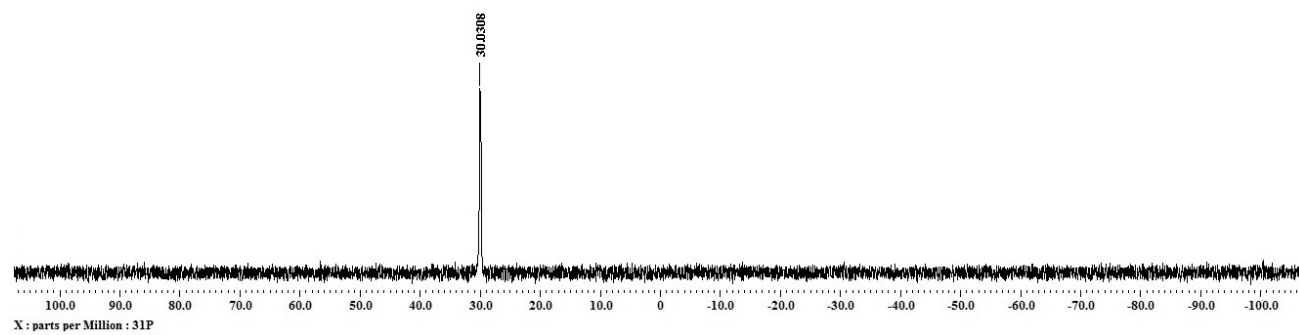

S-6.  $^{31}\text{P}$  NMR spectrum of complex 2 in  $\text{CDCl}_3$ .

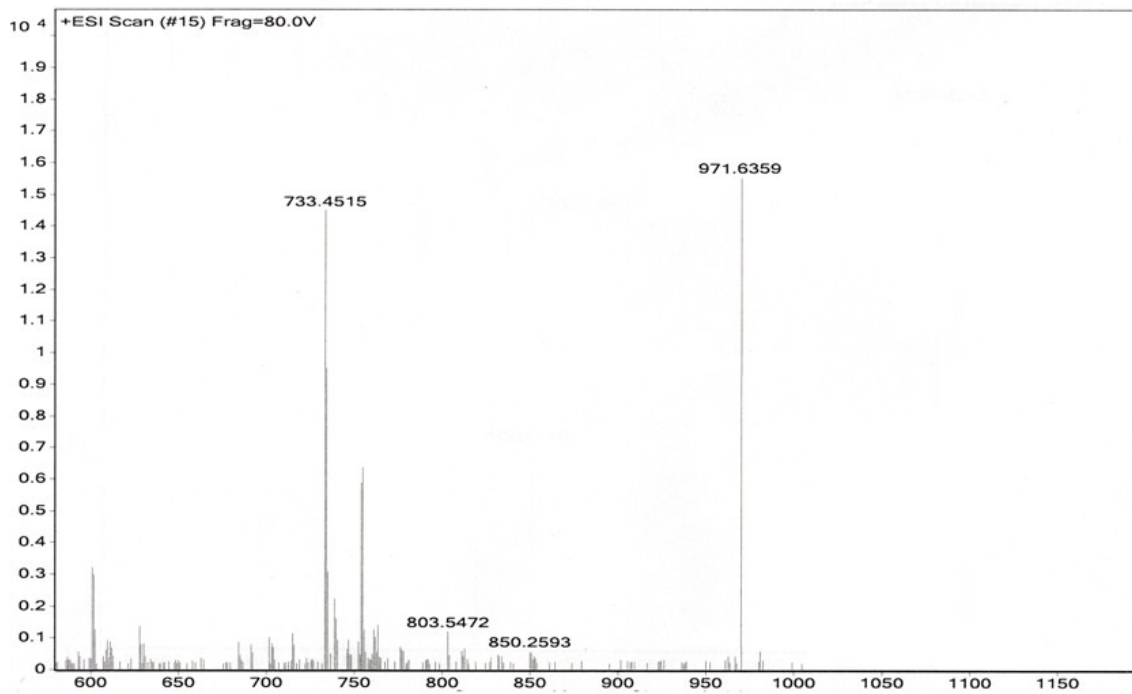

S-7. ESI-MS spectrum of complex 1.



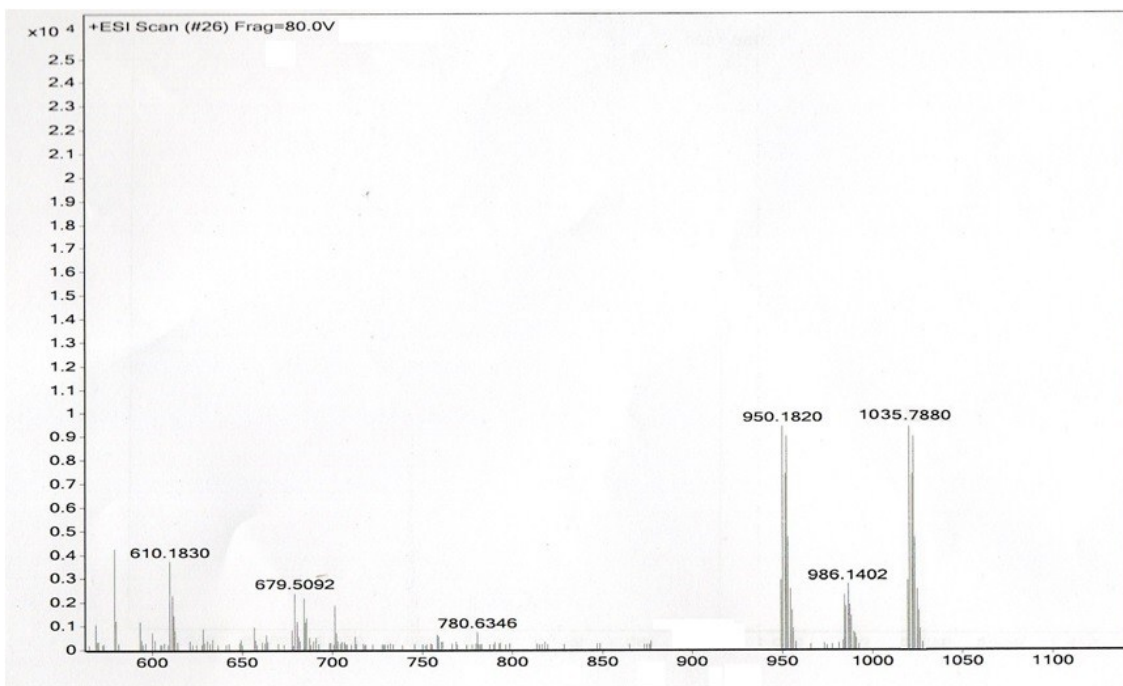

S-8. ESI-MS spectrum of complex 2.

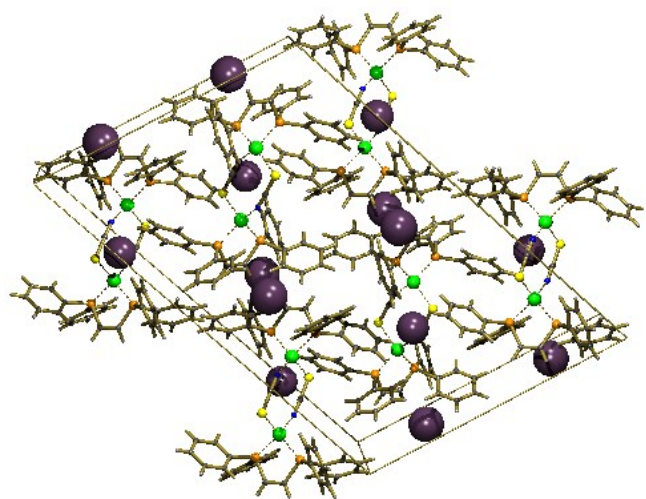

**S-9.** Self-assembly of complex **2** showing solvent accessible voids in the crystal lattice.

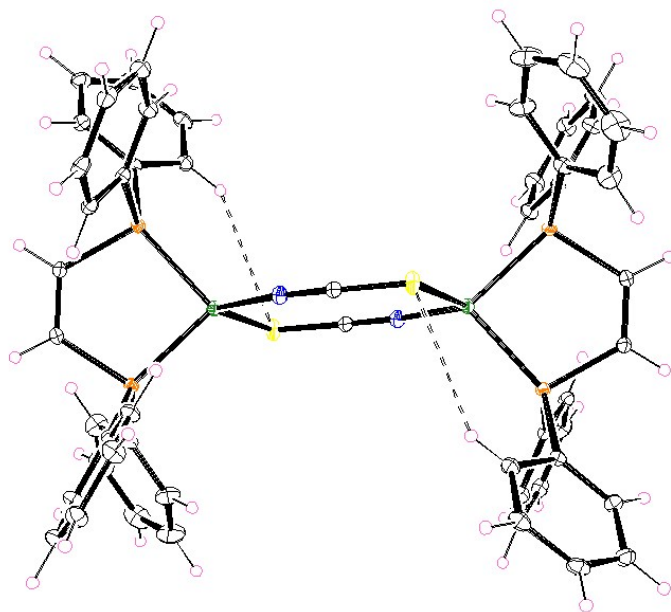

**S-10.** Ortep diagram of complex **2** showing C-H...S hydrogen bond interactions in the crystal lattice [C(27)-H(27)···S1<sup>#</sup>(3.131Å, 148.93°);C(27)<sup>#</sup>-H(27)<sup>#</sup>···S1(3.131Å, 148.93°)].

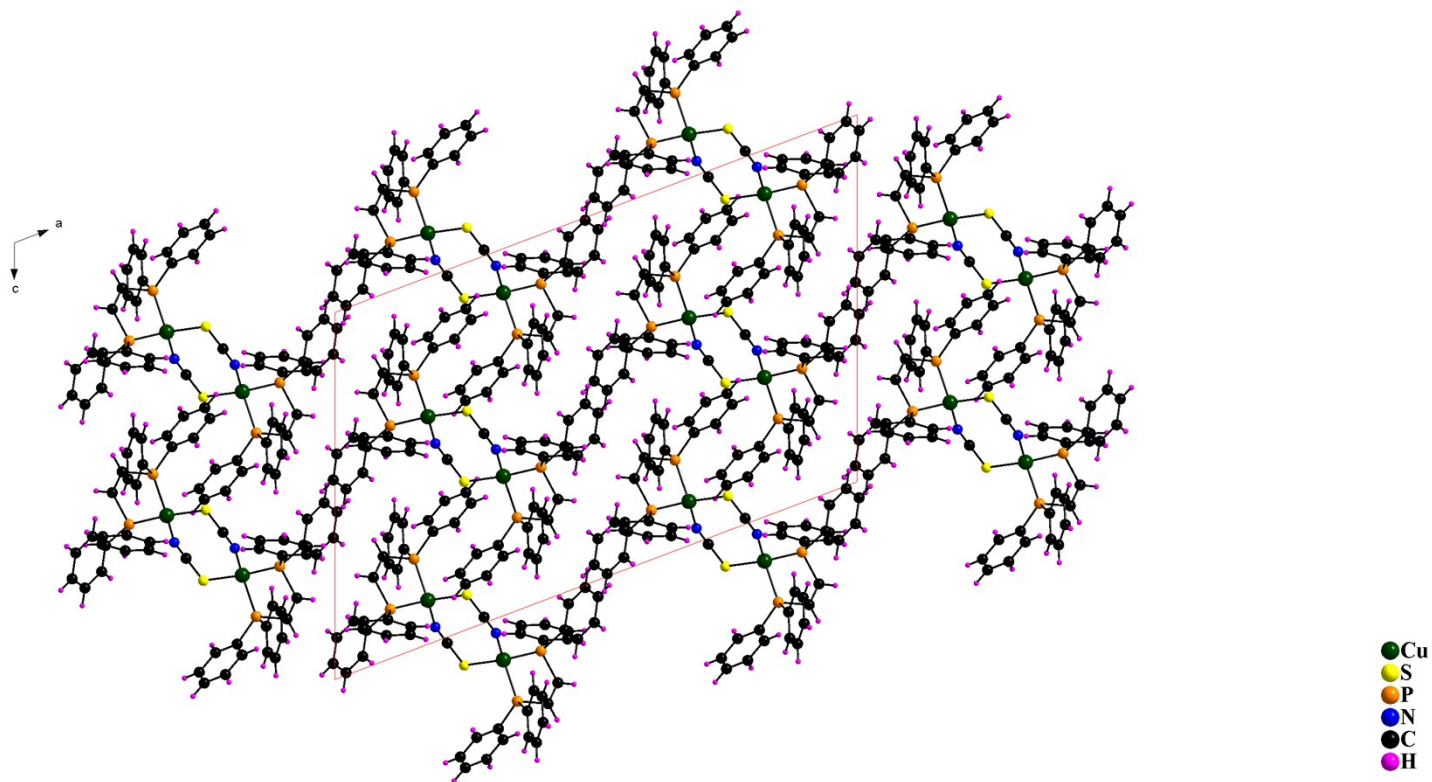

S-11. Crystal packing diagram of complex 2 viewed along the *b* axis.

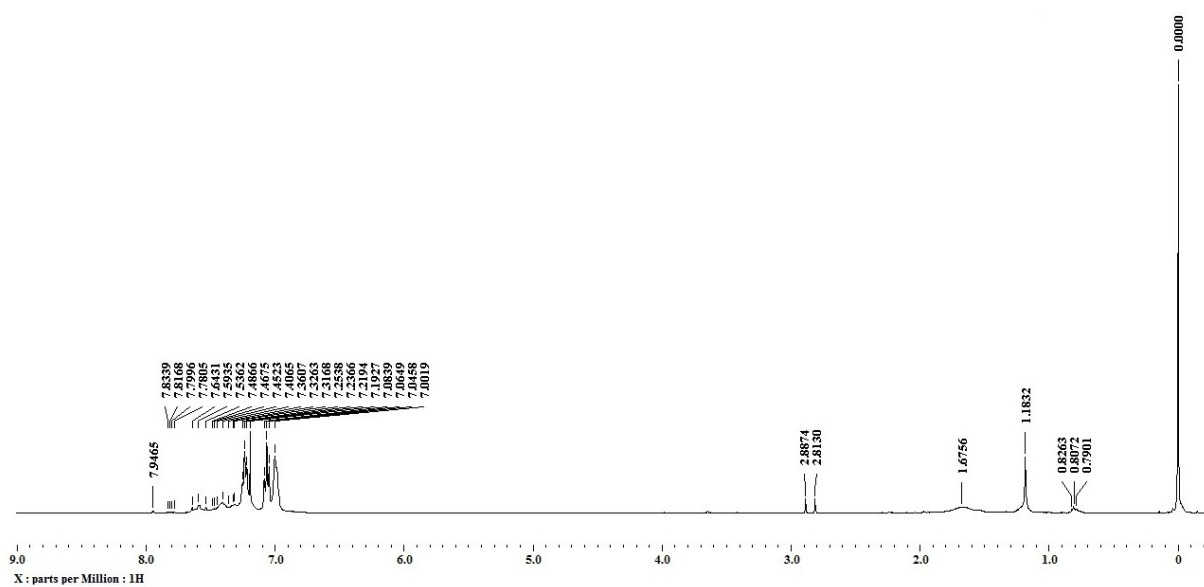

**S-12.** <sup>1</sup>H NMR spectrum of the reaction mixture for the synthesis of 3-phenylpropionic acid from CO<sub>2</sub> and Phenylacetylene catalysed by complex **2** in CDCl<sub>3</sub> after 5h at room temperature.

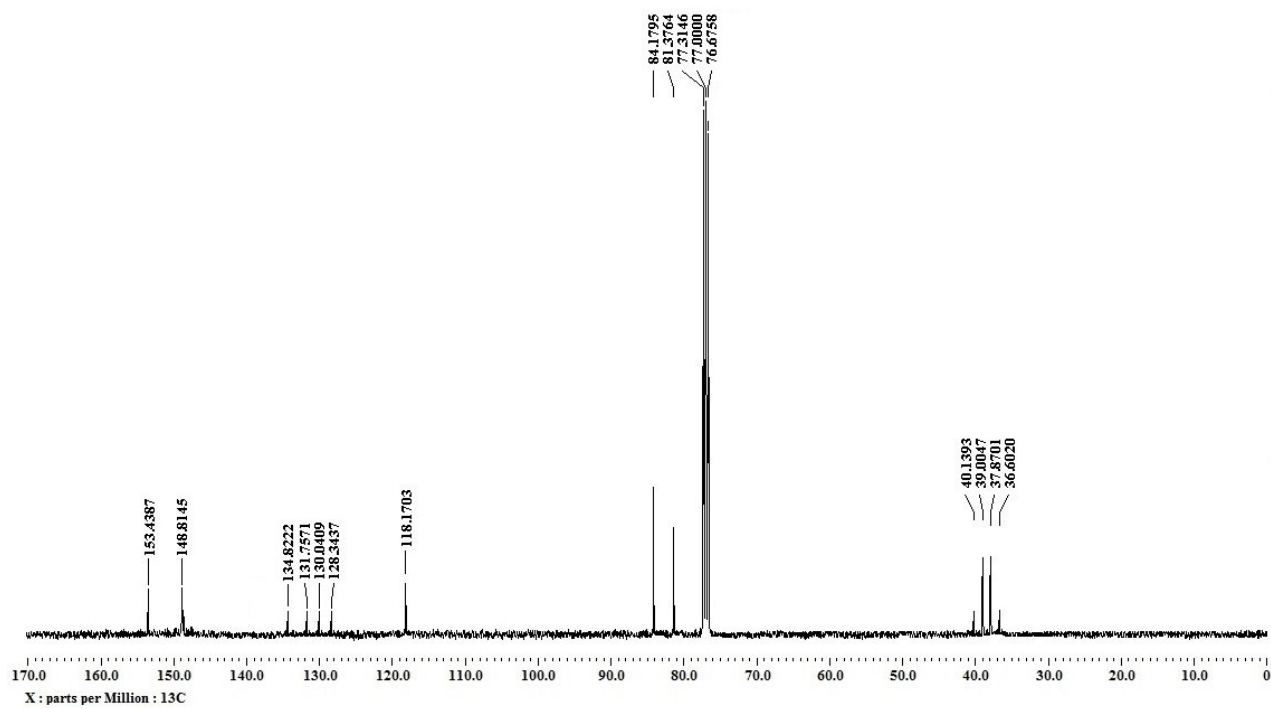

**S-13.**  $^{13}\text{C}$  NMR spectrum of the reaction mixture for the synthesis of 3-phenylpropionic acid from  $\text{CO}_2$  and Phenylacetylene catalysed by complex **2** in  $\text{CDCl}_3$  after 5h at room temperature.

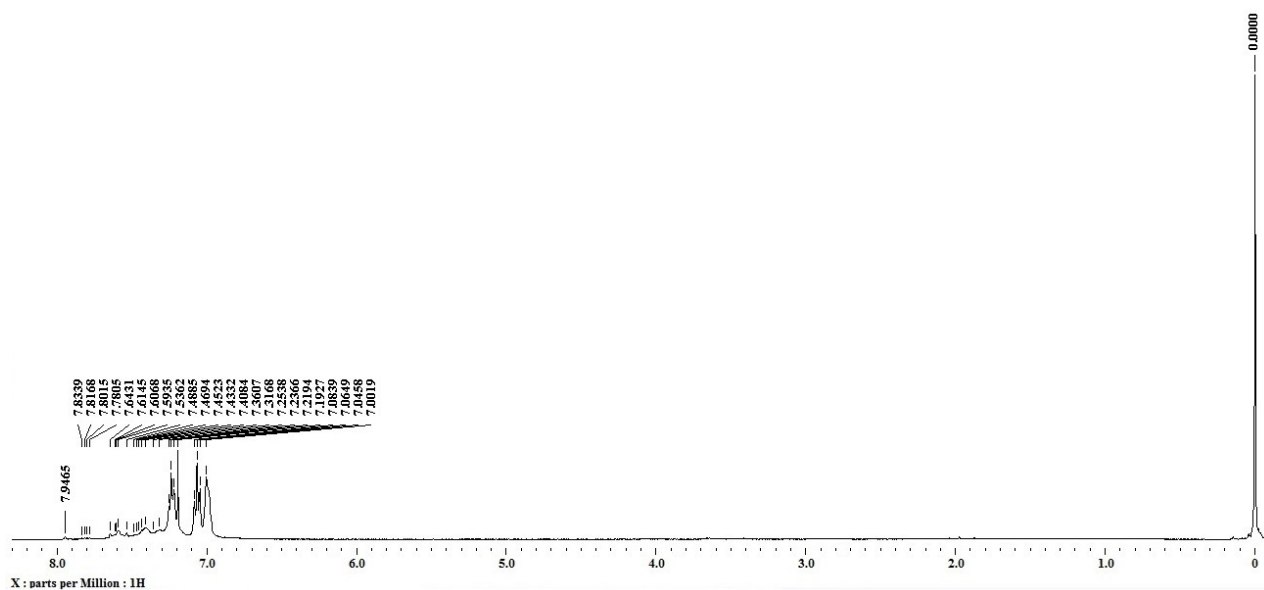

**S-14.**  $^1\text{H}$  NMR spectrum of the reaction mixture for the synthesis of 3-phenylpropionic acid from  $\text{CO}_2$  and Phenylacetylene catalysed by complex **2** in  $\text{CDCl}_3$  after 12h at room temperature

## Characterization Data:

### 3-phenylpropionic acid:

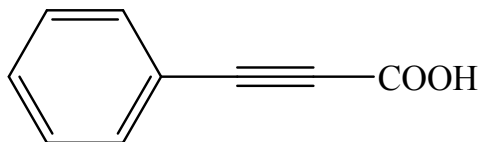

$^1\text{H}$  NMR (400 MHz,  $\text{CDCl}_3$ ):  $\delta = 7.60$  (d,  $J = 7.3$  Hz, 2H, Ar-H), 7.43 (t,  $J = 8.0$  Hz, 1H, Ar-H), 7.36 (t,  $J = 5.1$  Hz, 2H, Ar-H);  $^{13}\text{C}$  NMR (400 MHz,  $\text{CDCl}_3$ ):  $\delta = 153.24$  (-COOH), 131.77, 130.02, 128.21, 118.26, 84.05, 81.41, 40.55, 39.77, 39.54, 39.26, 38.94, 38.70; GCMS  $m/z$ (% rel. inten.) 146 ( $\text{M}^+$ , 100).

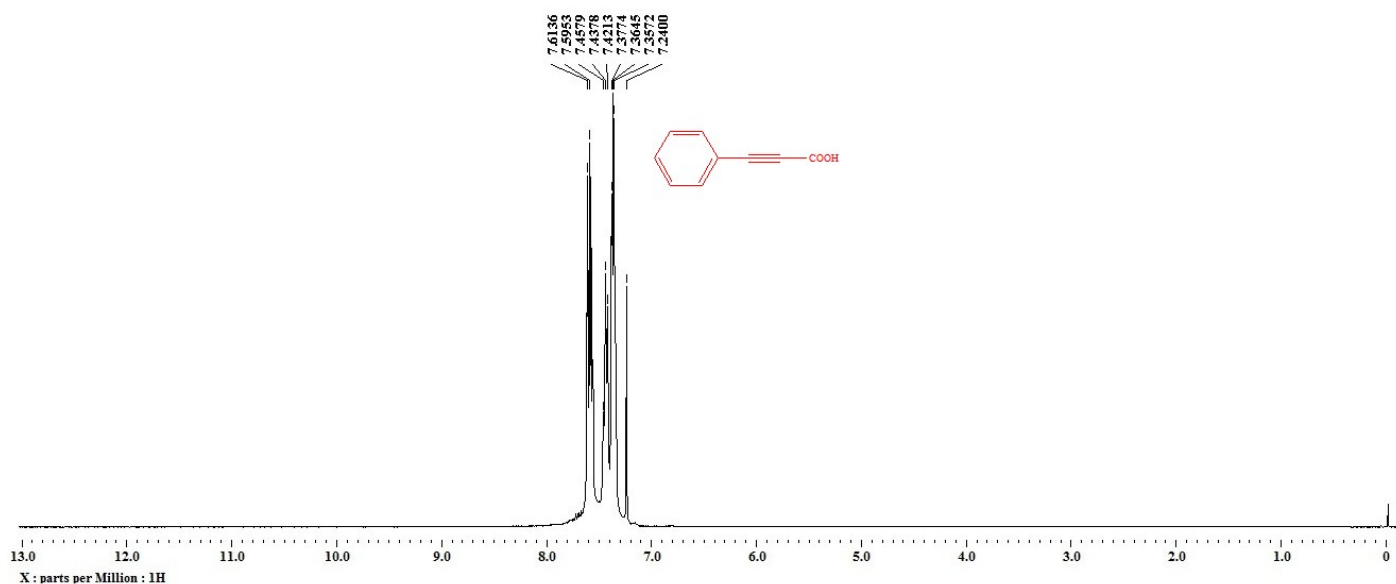



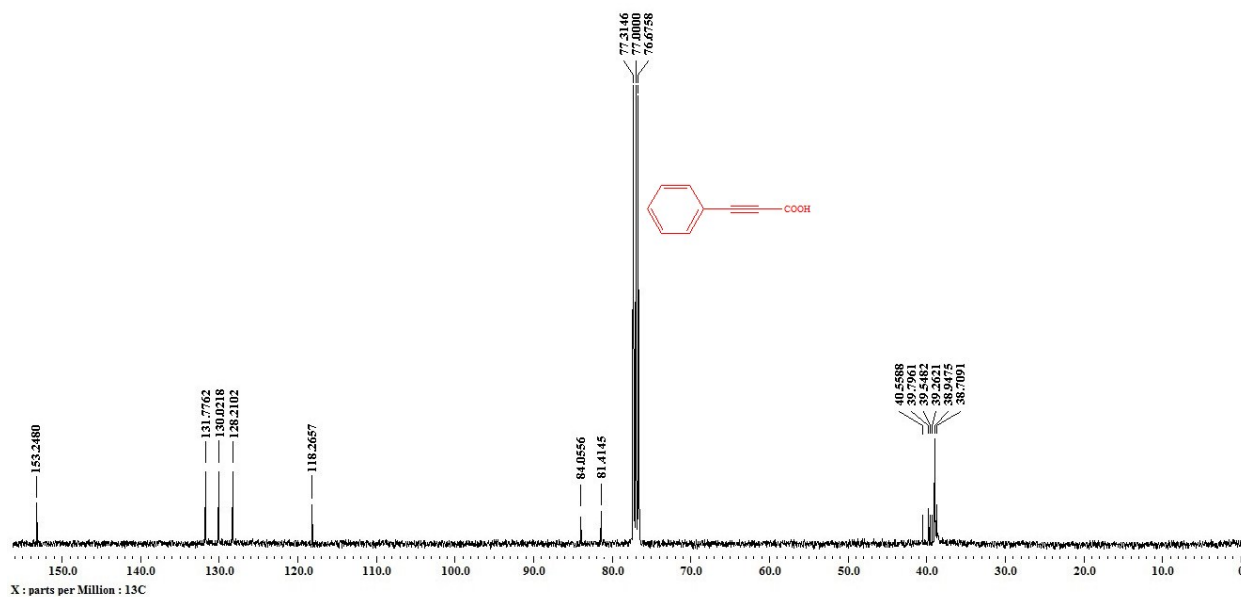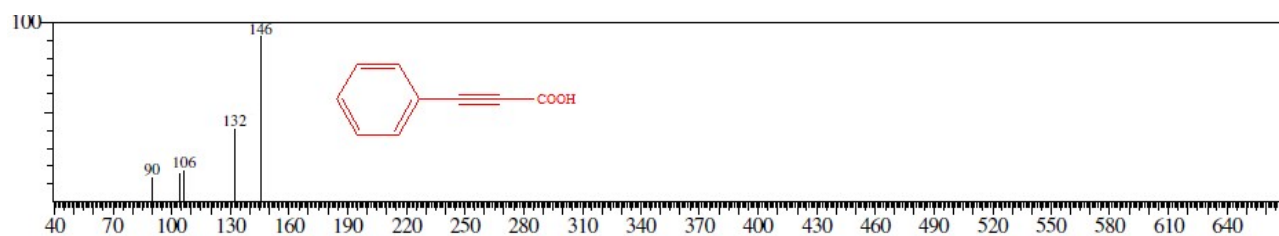

### 3-(4-chlorophenyl)propionic acid:

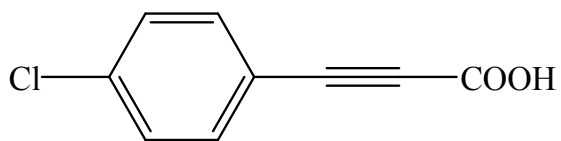

$^1\text{H}$  NMR (400 MHz,  $\text{CDCl}_3$ ):  $\delta$  = 7.64 (d,  $J$  = 10.2 Hz, 2H, Ar-H), 7.44 (d,  $J$  = 8.8 Hz, 2H, Ar-H);  $^{13}\text{C}$  NMR (400MHz,  $\text{CDCl}_3$ ):  $\delta$  = 153.20 (-COOH), 134.90, 133.38, 128.48, 117.28, 82.55, 82.32, 40.10, 40.06, 39.76, 39.53, 39.04, 38.97, 38.61; GCMS  $m/z$ (% rel. inten.) 181 ( $\text{M}^+$ , 100).

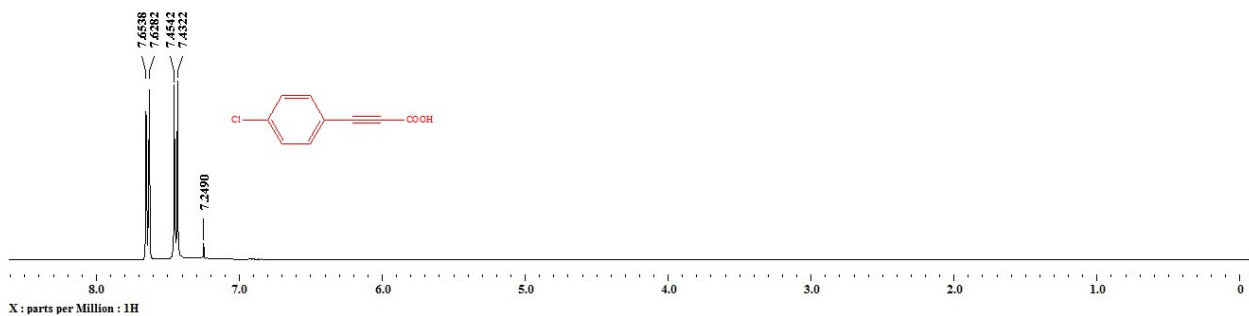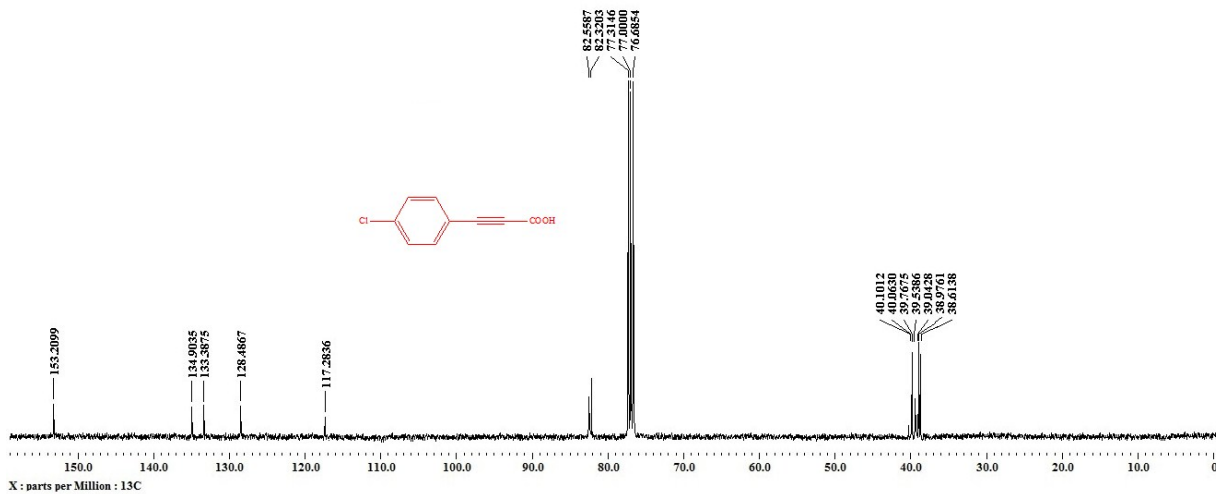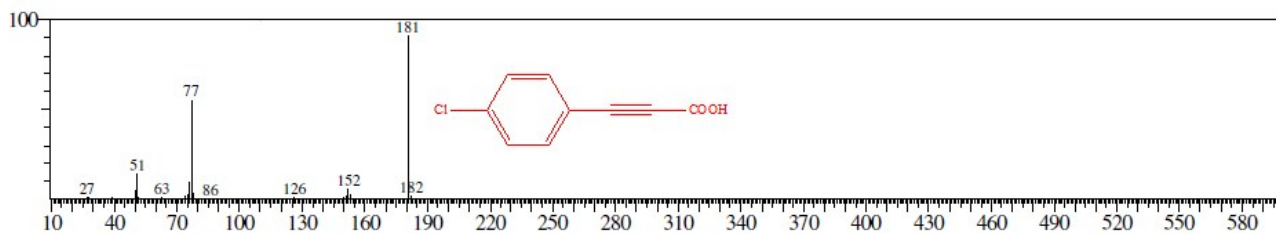

#### 4-Fluorophenylacetylenic acid:

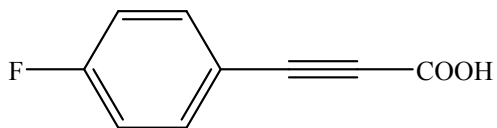

$^1\text{H NMR}$  (400 MHz,  $\text{DMSO-}d_6$ ):  $\delta$ =13.61 (s, 1H), 7.74-7.60 (m, 2H), 7.35 (d,  $J$  = 2.9 Hz, 2H);  $^{13}\text{C NMR}$  (400 MHz,  $\text{DMSO-}d_6$ ):  $\delta$  = 162.31 (-COOH), 154.23, 135.35, 116.53, 116.35, 83.34, 81.66; GCMS  $m/z$  (% rel. inten.) 165 ( $\text{M}^+$ , 100).

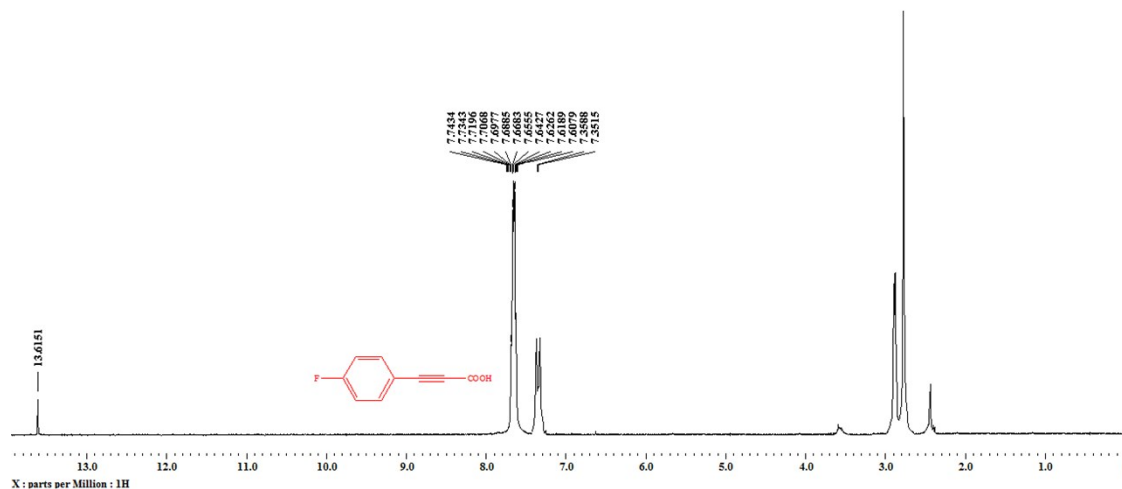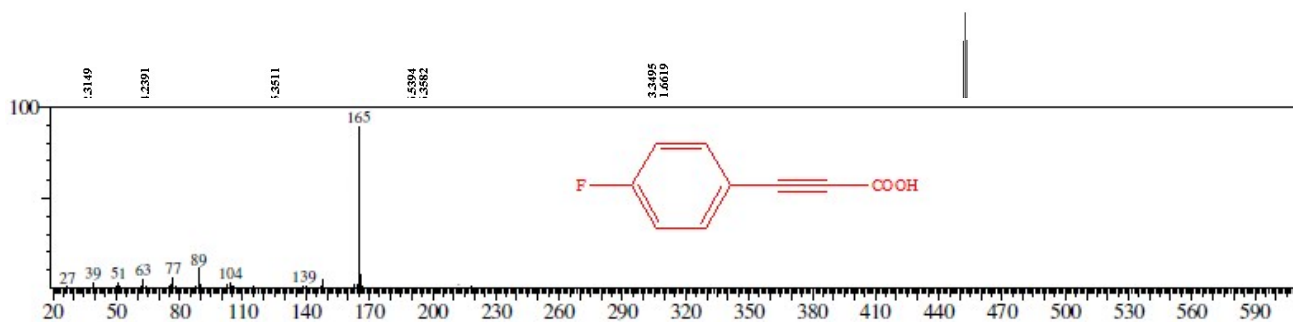

### 3-(4-methoxyphenyl)propionic acid:

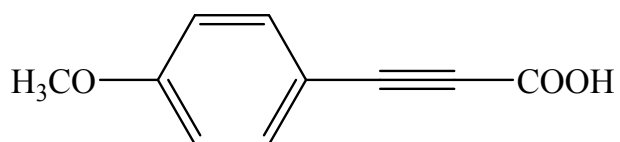

$^1\text{H}$  NMR (400 MHz,  $\text{CDCl}_3$ ):  $\delta$  = 7.41 (d,  $J$  = 7.6 Hz, 2H, Ar-H), 7.34 (d,  $J$  = 9.1 Hz, 2H, Ar-H), 3.74 (s, 3H,  $\text{CH}_3$ );  $^{13}\text{C}$  NMR (400 MHz,  $\text{CDCl}_3$ ):  $\delta$  = 160.66(-COOH), 153.57, 133.39, 113.75, 111.10, 84.79, 80.83, 55.40, 40.12, 40.10, 39.76, 39.58, 39.30, 38.99, 38.61; GCMS  $m/z$ (% rel. inten.) 176 ( $\text{M}^+$ , 100).

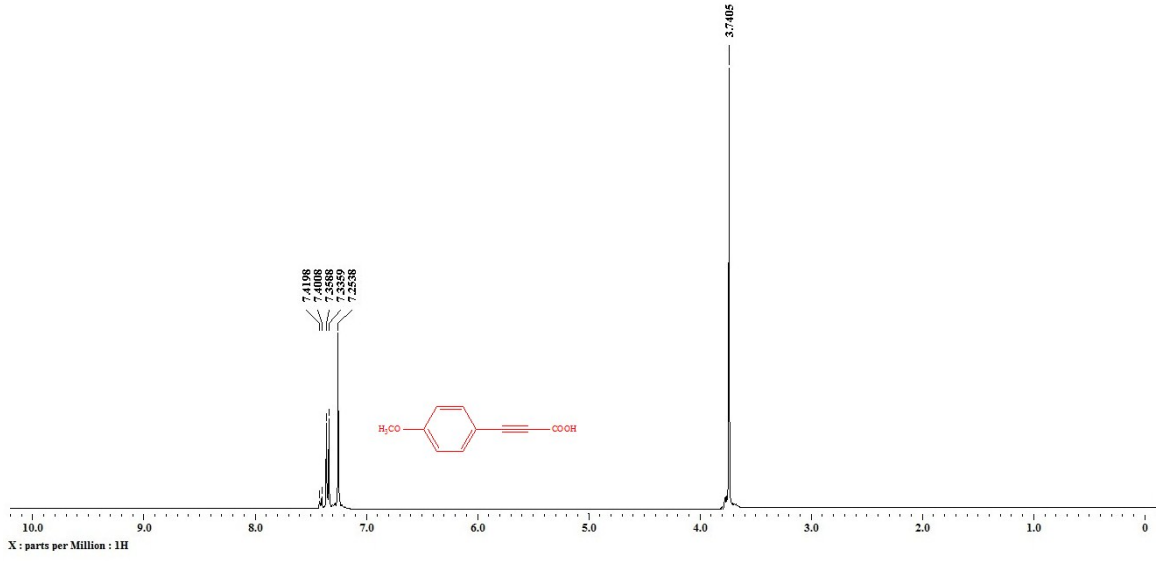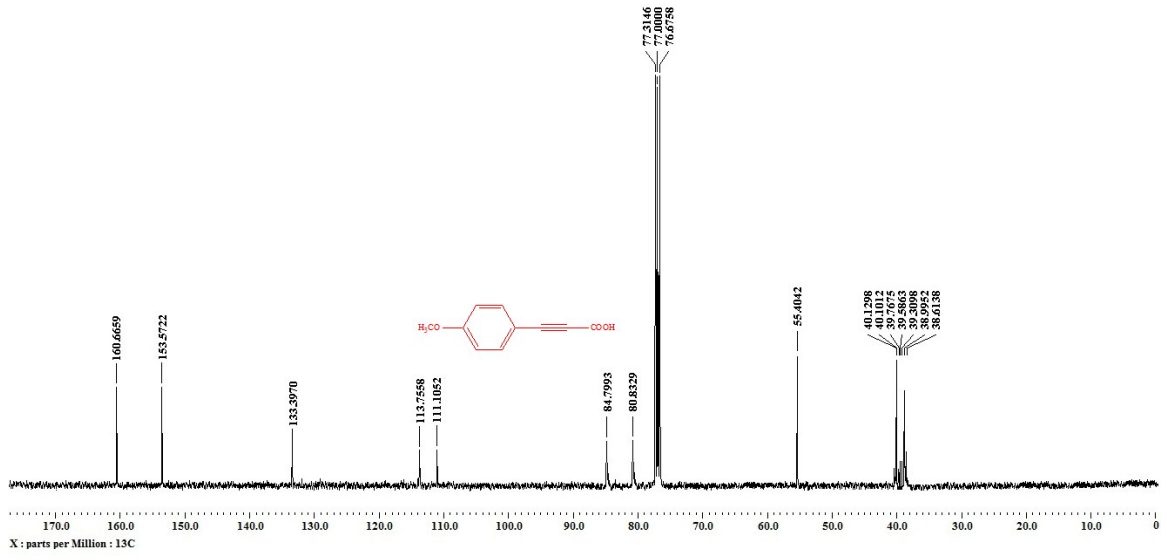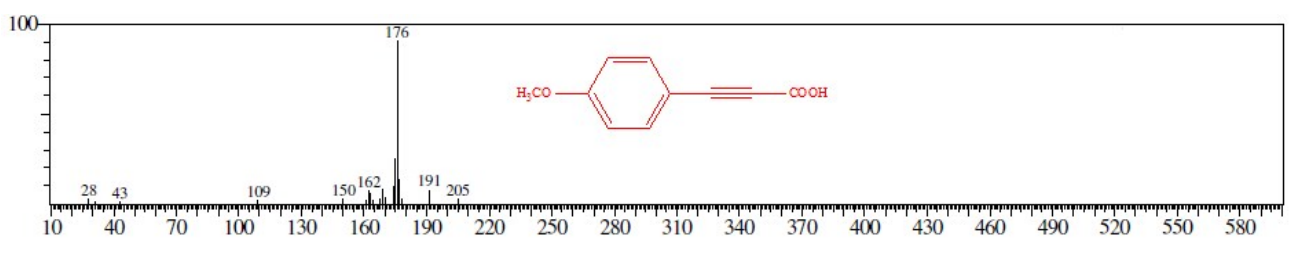

**3-p-tolylpropionic acid:**

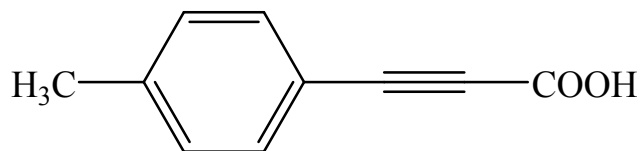

<sup>1</sup>H NMR (400 MHz, CDCl<sub>3</sub>):  $\delta$  = 7.46 (d,  $J$  = 27.8 Hz, 2H, Ar-H), 7.32 (d,  $J$  = 5.8 Hz, 2H, Ar-H), 2.34 (s, 3H, CH<sub>3</sub>); <sup>13</sup>C NMR (400 MHz, CDCl<sub>3</sub>):  $\delta$  = 153.54 (-COOH), 140.18, 131.45, 128.42, 115.56, 84.37, 81.15, 40.23, 40.07, 39.77, 39.33, 39.25, 38.87, 38.60, 21.41; GCMS  $m/z$ (% rel. inten.) 160 (M<sup>+</sup>, 100).

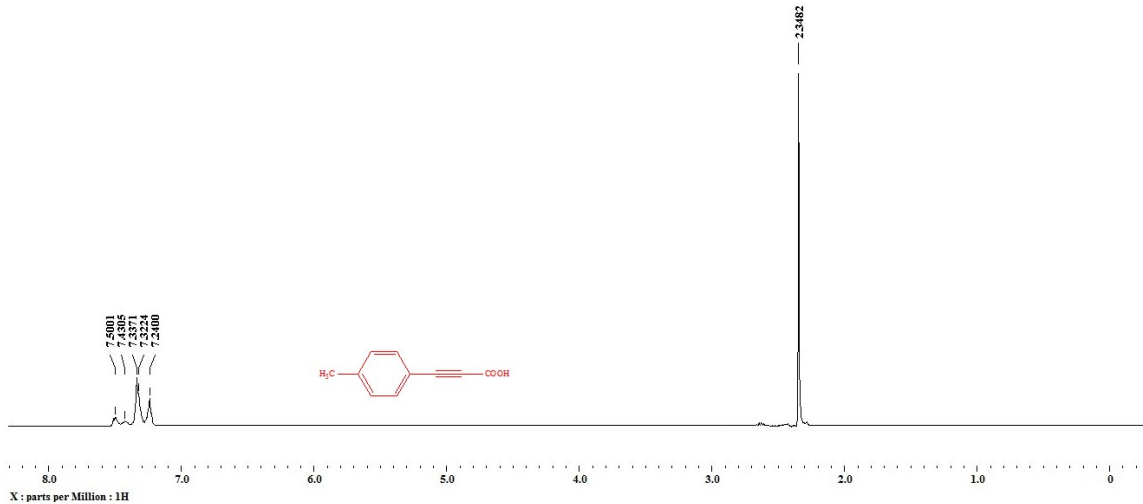

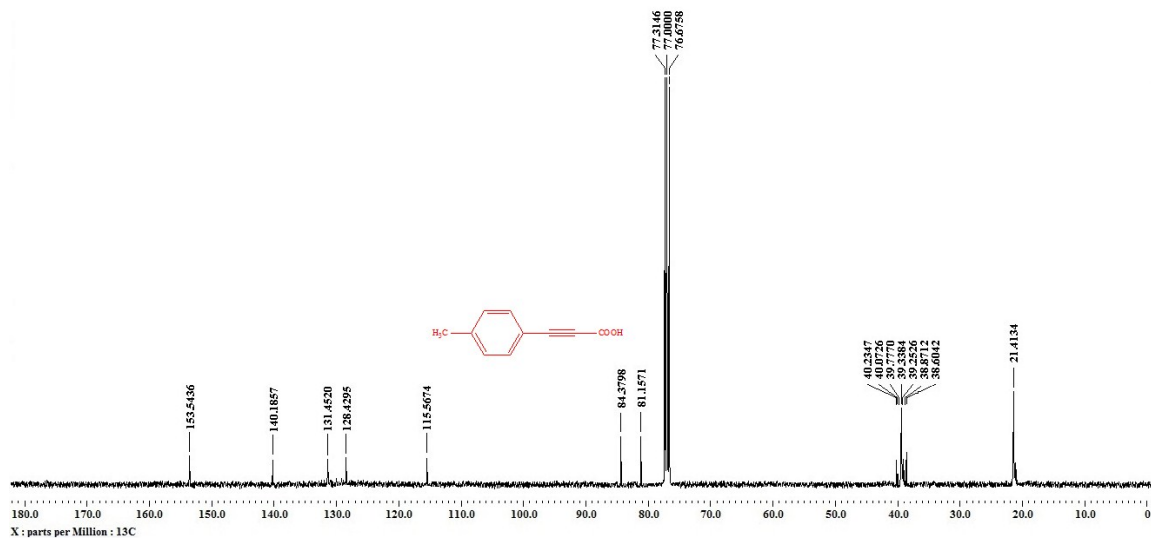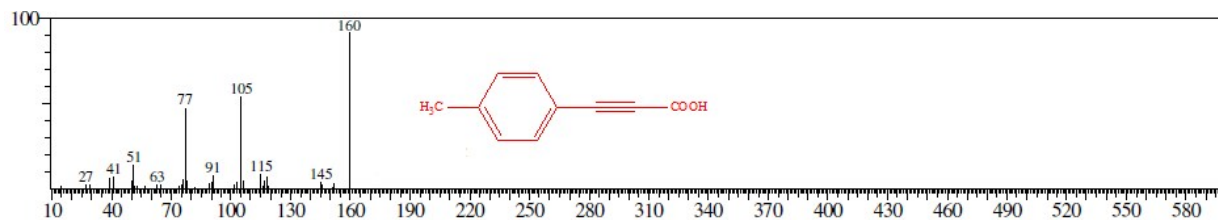

#### 4-nitrophenylpropionic acid:

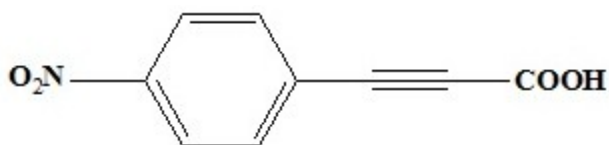

$^1\text{H}$  NMR (400 MHz,  $\text{CDCl}_3$ ):  $\delta$  = 8.28 (d,  $J$  = 6.8 Hz, 2H, Ar-H), 7.95 (d,  $J$  = 8.7 Hz, 2H, Ar-H);  $^{13}\text{C}$  NMR (400MHz,  $\text{CDCl}_3$ ):  $\delta$  = 153.84 (-COOH), 148.30, 148.18, 133.73, 125.63, 124.04, 85.08, 81.70, 40.12, 39.91, 39.70, 39.50, 39.29, 39.08, 38.87; GCMS  $m/z$ (% rel. inten.) 167 ( $\text{M}^+$ , 100).

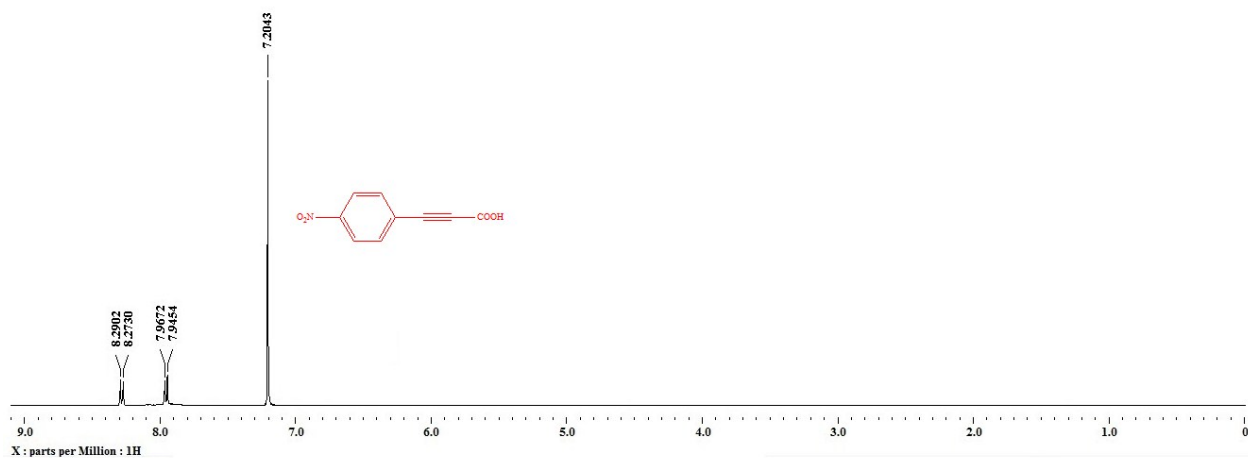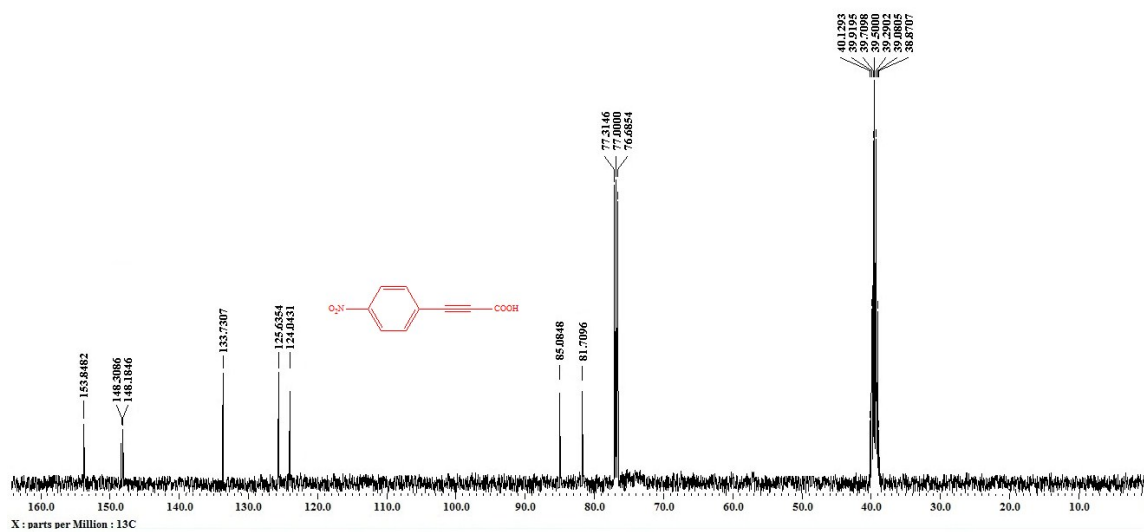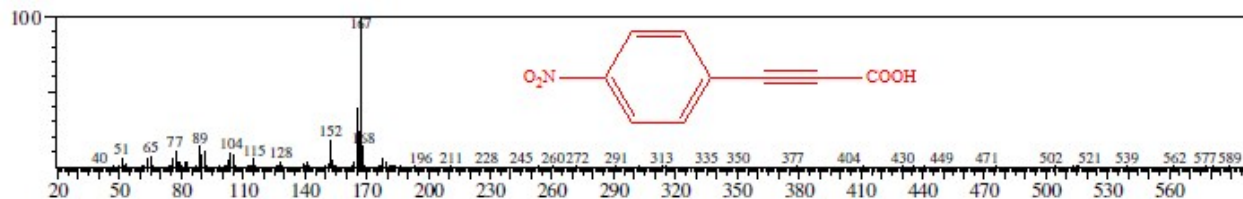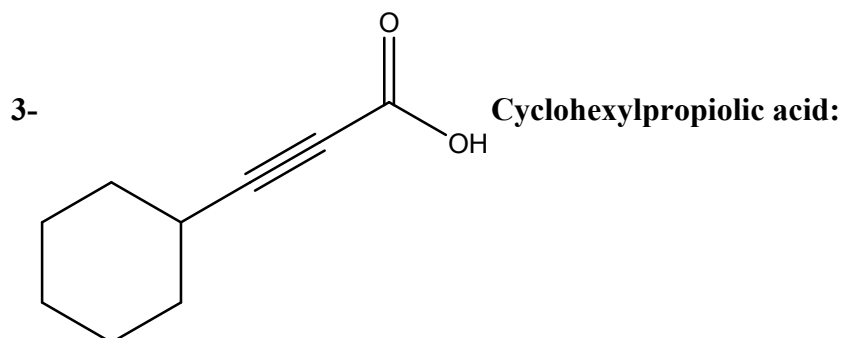

$^1\text{H}$  NMR (400 MHz,  $\text{CDCl}_3$ ):  $\delta$  = 13.38 (br, s, 1H), 2.89- 2.55 (m, 1H), 2.26-2.39 (m, 2H), 1.90-2.15 (m, 2H), 1.61-1.18 (m, 6H);  $^{13}\text{C}$  NMR (400 MHz,  $\text{CDCl}_3$ ):  $\delta$  = 154.83, 91.72, 74.62, 31.91, 28.22, 25.50, 24.56; GCMS  $m/z$ (% rel. inten.) 152 ( $\text{M}^+$ , 100).

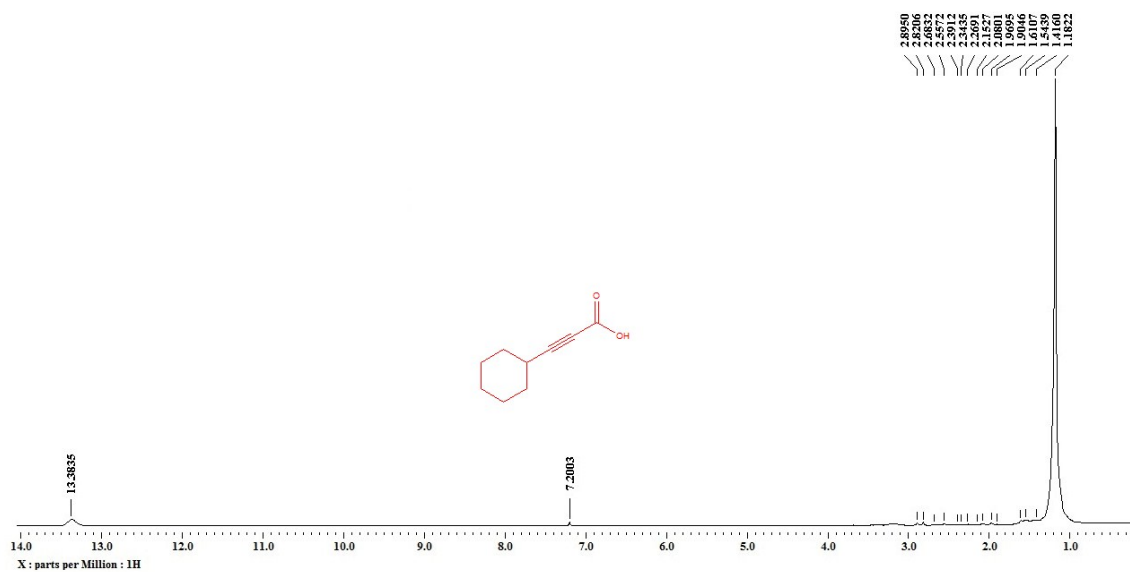



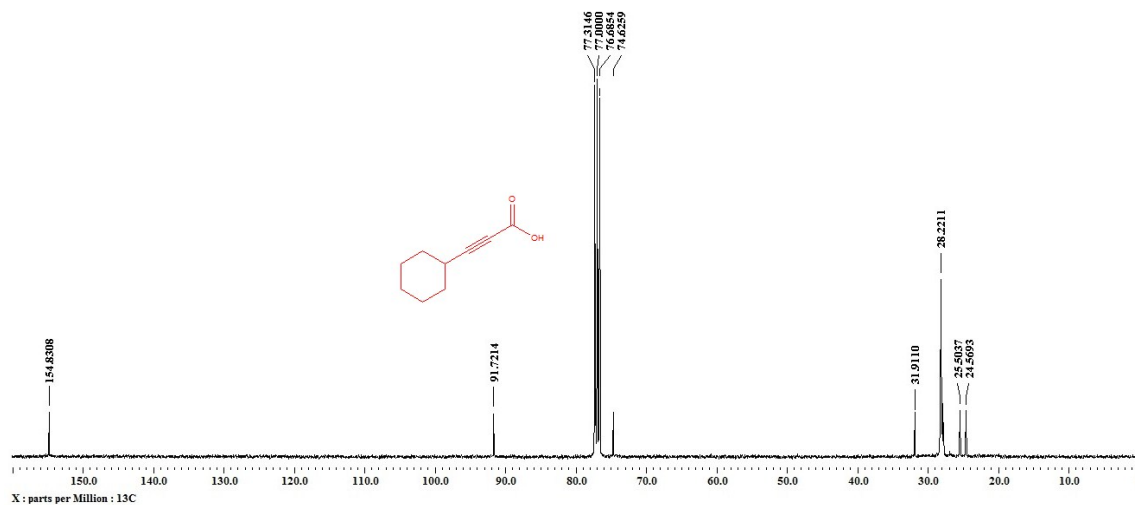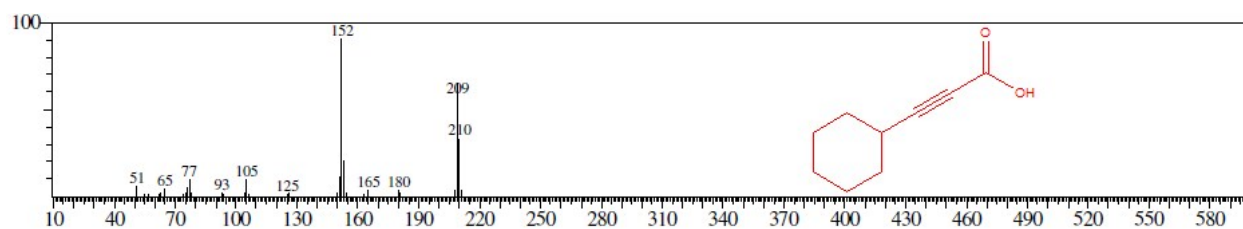

### 3-(trimethylsilyl)propionic acid:

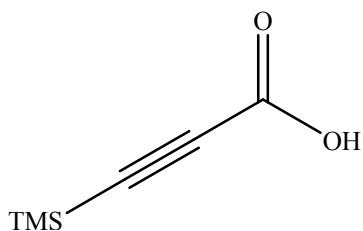

$^1\text{H}$  NMR (400 MHz,  $\text{CDCl}_3$ ):  $\delta = 10.75(\text{br, s, 1H})$ ,  $0.21(\text{s, 9H, CH}_3\text{Si})$ ;  $^{13}\text{C}$  NMR (400 MHz,  $\text{CDCl}_3$ ):  $\delta = 154.48$ ,  $98.81$ ,  $53.58$ ,  $31.90$ ,  $29.67$ ,  $29.34$ ,  $22.67$ ,  $3.52$ ; GCMS  $m/z$ (% rel. inten.)  $142(\text{M}^+, 100)$ .

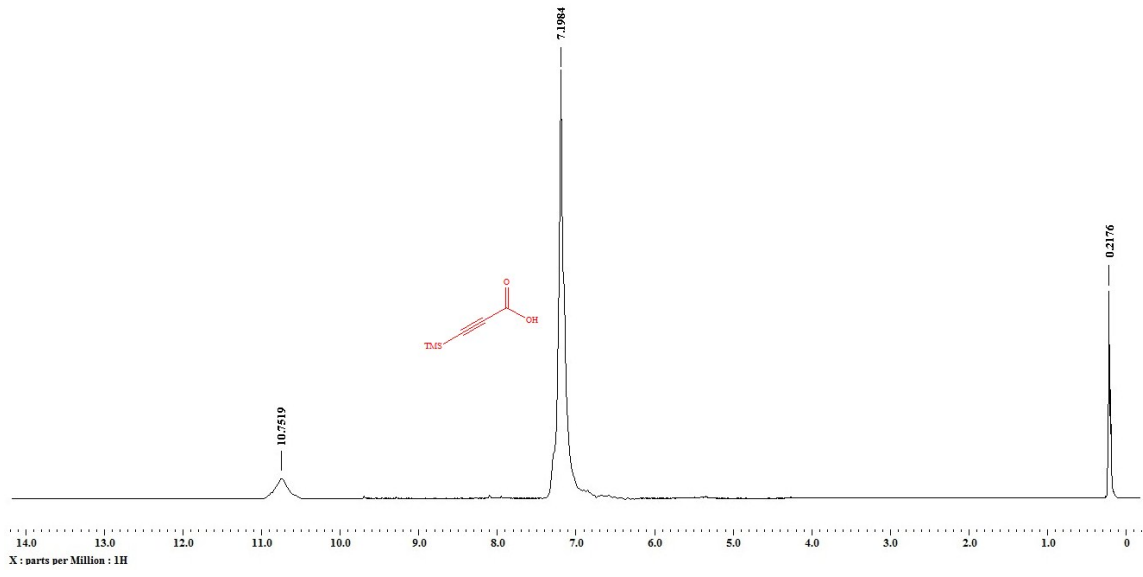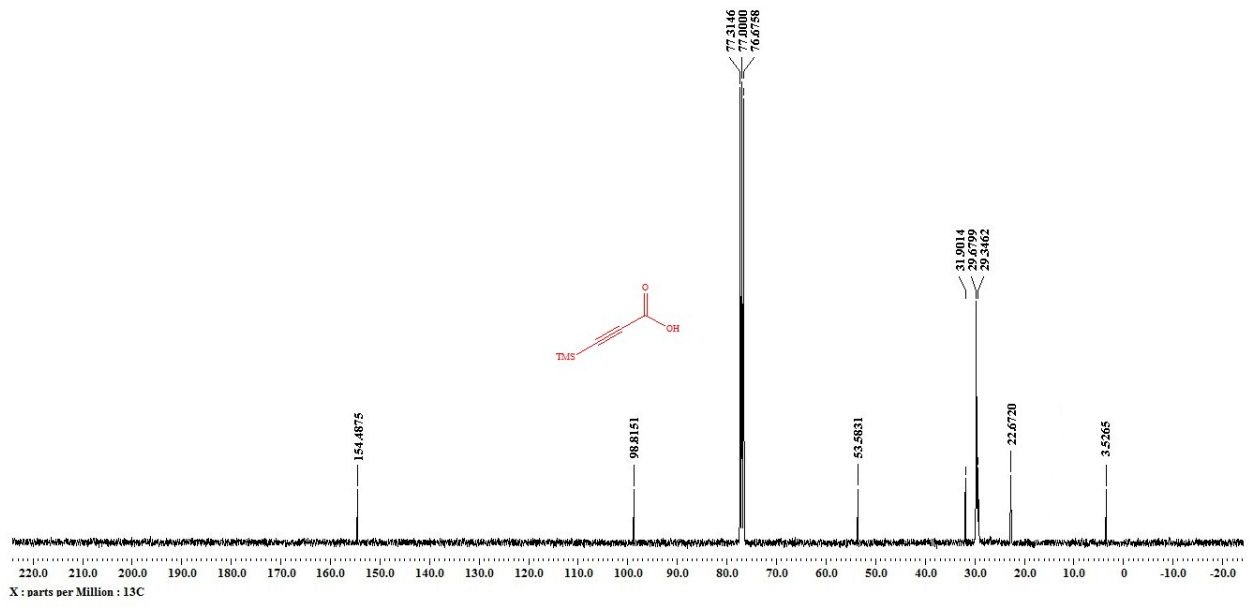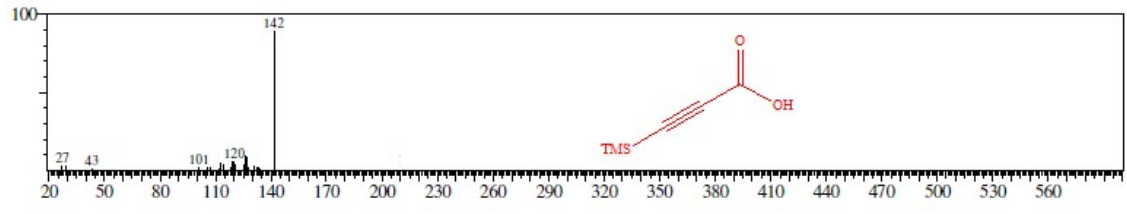

### Hept-2-ynoic acid:

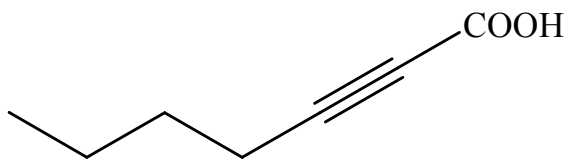

$^1\text{H}$  NMR (400 MHz,  $\text{DMSO-}d_6$ ):  $\delta$  = 13.12 (s, 1H), 2.36 (t,  $J$  = 1.4 Hz, 2H,  $\text{CH}_2$ ); 1.46 (p,  $J$  = 2.9 Hz, 2H,  $\text{CH}_2$ ); 1.36 (h,  $J$  = 1.4 Hz,  $\text{CH}_2$ ); 0.89 (t,  $J$  = 2.2 Hz, 3H,  $\text{CH}_3$ );  $^{13}\text{C}$  NMR (400 MHz,  $\text{DMSO-}d_6$ ):  $\delta$  = 154.27, 88.36, 74.20, 29.17, 21.35, 17.34, 13.34; GCMS  $m/z$ (% rel. inten.) 140 ( $\text{M}^+$ , 100).

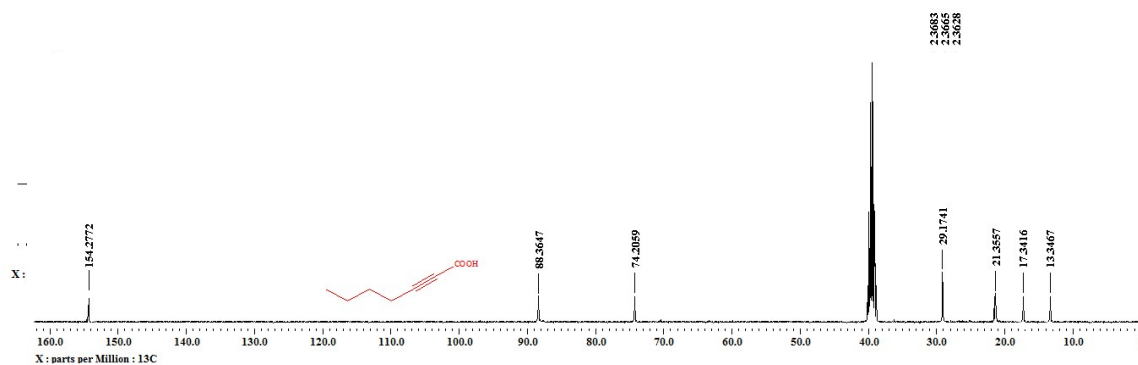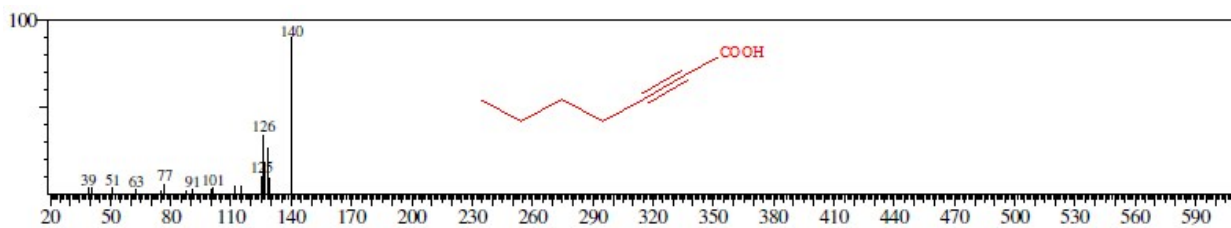

### Hept-6-en-2-ynoic acid:

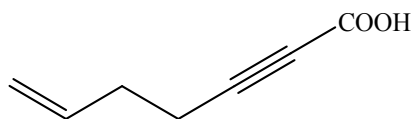

$^1\text{H}$  NMR (400 MHz,  $\text{DMSO-}d_6$ ):  $\delta=13.12$  (s, 1H), 5.87 (dd,  $J = 3.0$  Hz, 1H, CH), 5.08 (dd,  $J = 1.0$  Hz, 2H,  $\text{CH}_2$ ), 2.46 (t,  $J = 1.2$  Hz, 2H,  $\text{CH}_2$ ), 2.28 (q,  $J = 1.0$  Hz, 2H,  $\text{CH}_2$ );

$^{13}\text{C}$  NMR (400 MHz,  $\text{DMSO-}d_6$ ):  $\delta = 154.24, 136.31, 116.30, 87.68, 74.40, 31.12, 17.34$ ;

GCMS  $m/z$ (% rel. inten.) 138 ( $\text{M}^+$ , 100).

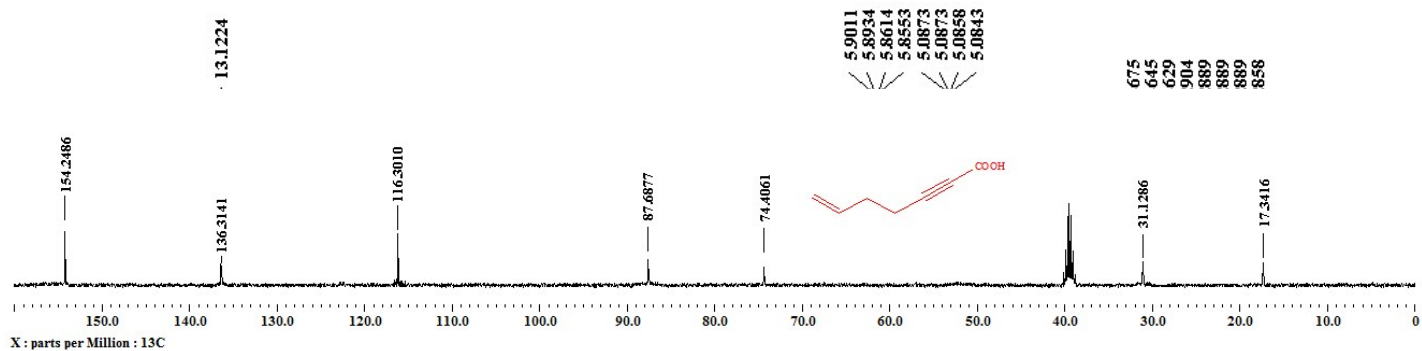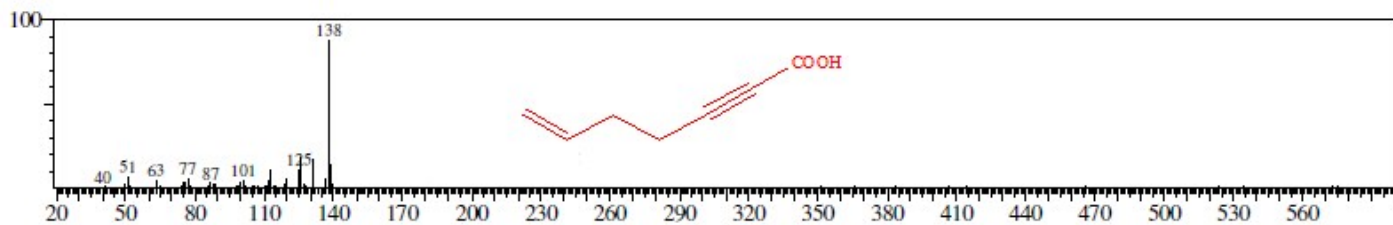

Supplement: c7nj03038j1.pdf [file c7nj03038j1.pdf]
